# Supplementary material for: Bacterial community composition in the gut content of Lampetra japonica revealed by 16S rRNA gene pyrosequencing
Source: PubMed Central journal article supplement (PMC5716533; doi:10.1371/journal.pone.0188919), 2017-12-05
Supplement: pone.0188919.s001.pdf [file pone.0188919.s001.pdf]

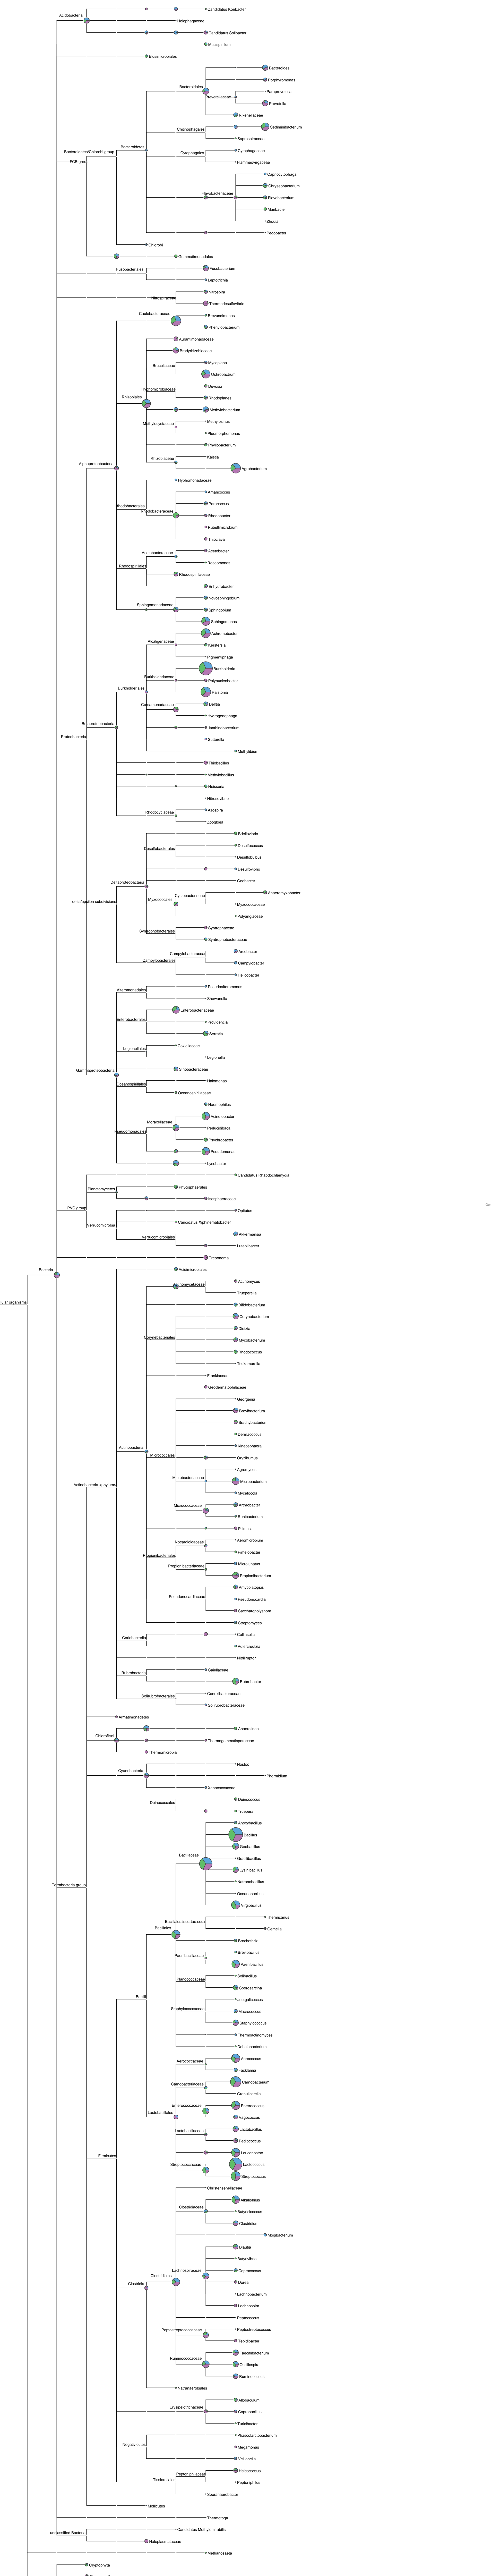

Genus

Not assigned

Amoebozoa

Legend:

 LYa  LYb  LYc
